# Supplementary material
Source: PubMed Central journal article supplement (PMC5041510)
Supplement: Supp_App1.pdf [file Supp_App1.pdf]

**Appendix 1. What is the  $K_{apparent}$  of the lifetime change of a fluorescent sensor, given its response properties?** This simple treatment considers a two-state sensor, with an empty and full state of the binding site, and an intensity ratio  $R$  for the total fluorescence of the full state divided by the empty state. Provision is also made for cooperativity, in the form of a Hill coefficient. Terms are:

$N_0$  = intensity of empty state

$\tau_0$  = lifetime of empty state

$N_1$  = intensity of full state

$\tau_1$  = lifetime of full state

$R = N_1/N_0$

$h$  = Hill coefficient

$\varphi = \frac{1}{1+(\frac{K}{c})^h}$  is the fractional occupancy of the full state at [analyte] =  $c$ , where  $K$  is the  $K_{apparent}$

The intensity change is then midway at [analyte] =  $K$ , because  $\varphi = 0.5$  and thus

$$N = N_0(1 - \varphi) + N_1\varphi = (N_1 + N_0)/2$$

**At what [analyte] is the lifetime change midway?**

We must solve for the  $c$  that gives  $\tau(c) = (\tau_1 + \tau_0)/2$ .

The mean lifetime is the photon-count-weighted average of the two states' lifetimes:

$$\tau(c) = \frac{\tau_0 N_0(1 - \varphi) + \tau_1 N_1 \varphi}{N_0(1 - \varphi) + N_1 \varphi}$$

Solving for the midpoint:

$$\frac{(\tau_1 + \tau_0)}{2} = \frac{\tau_0 N_0(1 - \varphi) + \tau_1 N_1 \varphi}{N_0(1 - \varphi) + N_1 \varphi}$$

gives:

$$(1 - \varphi)/\varphi = N_1 / N_0 = R$$

And substituting the formula for  $\varphi$  gives:

$$\left(\frac{K}{c}\right)^h = R$$

The  $c$  that satisfies this is equal to  $K_{apparent} = K \cdot R^{-\frac{1}{h}}$ . So the shift in  $K_{apparent}$  is a factor =  $R^{-\frac{1}{h}}$

For some sensors, the relative photon yield of the two states may be dependent on the excitation wavelengths. This would provide a way of shifting the midpoint of the lifetime dose-response, by using different excitation wavelengths.
